# Supplementary material for: Synthesis and molecular modelling studies of resorcin[4]arene-capped porphyrinsElectronic supplementary information (ESI) available: Benzene-d6 shifts of compound 7 compared with those of component units, details on the new parameters added to heme29 and cartesian coordinate files of lowest-energy conformations of 3, 5 and 7 (benzene inside) on the molecular modelling studies (pdb and arc files). See http://www.rsc.org/suppdata/ob/b3/b303741j/See Ref. 1.
Source: Royal Society of Chemistry journal article supplement (doi:10.1039/b303741j), 2003-01-01
Supplement: b303741j.pdf [file b303741j.pdf]

## **Synthesis and Molecular Modeling of Resorcin[4]arene-Capped Porphyrins**

Bruno Botta, Paola Ricciardi, Carlo Galeffi, Maurizio Botta, Andrea Tafi, Rebecca Pogni, Rosa Iacovino, Isidoro Garella, Benedetto Di Blasio, and Giuliano Delle Monache,

### **Supporting information available:**

Details on the new parameters added to heme29 (1 figure, 4 tables; 4 pages).

Cartesian Coordinate Files of lowest-energy conformations of **3**, **5** and **7** (benzene inside) on the molecular modeling studies (3.arc files; 12 pages).

### *Molecular modeling*

All the computational work was carried out on Silicon Graphics workstations (Indigo Entry 4000 and O2). Molecular Mechanics (MM) and Dynamics (MD) calculations were performed using MSI Inc. softwares (version 95.0) InsightII and Discover. Heme29,<sup>1S</sup> a specific version of CVFF force field, developed to model the heme moiety of cytochromes and defining new special atom types and parameters, was considered as the starting force field. Heme29 was adapted to our systems, which lack the coordinated metal ion, keeping few original CVFF stretching, bending and torsional parameters to guarantee the planarity of the porphyrin system. CVFF force field parameters simulate the porphyrin systems as constituted by 4 pyrrole rings connected by 4 aromatic carbon atoms without any agreement with the experimental reality. The update of CVFF force field from Kemmritz<sup>2S</sup> was considered as the starting force field to describe the porphyrin ring. Figure 1S reports the atom types used by Kemmritz. The CVFF stretching and bending parameters and the Kemmritz stretching parameter, applied in the present study to describe the peculiar bonds h-c#, na-hn and c]-cp of the porphyrin moiety, are reported in Tables 1S and 2S. The CVFF torsional parameter, describing the rotation around the bond c]-c, which replaces the heme29 torsional parameter in order to maintain the planarity of the porphyrin moiety, is reported in Table 3S. Moreover, a further bending parameter<sup>3S</sup> was added to describe the carbamate moiety of **7**. Finally, a new torsional parameter was implemented to describe the rotation around the bond connecting the porphyrin methine bridges of **5** and **7** to the phenyl rings of the arms (c]-cp bond). The new parameter was derived and calibrated taking as reference a tetraphenylporphyrin,<sup>4S</sup> whose 3D structure was known by X-ray crystallography, showing an average value of *ca* 60° for the above dihedral angle. To evaluate the torsional barrier around the c]-cp bond (see figure 1S), an adiabatic torsional potential curve was calculated along the dihedral angle, using MOPAC-AM1 calculations (Table 4S). This curve was reproduced by adding the following torsional term to our force field to describe the torsion c]-cp:  $n=4$ ,  $K_{\Phi}=2.7500$  kcal/mol,  $\Phi_0=0.0000^\circ$ .

This adapted Heme29 was employed in Discover for geometry optimizations.

Throughout all calculations a dielectric constant  $\epsilon = 1.0$  has and a scale factor = 0.5 for the 1-4 vdW and the 1-4 electrostatic interactions were used.

Partial atomic charges for MM and MD simulations were obtained through MOPAC calculations, using the MNDO-ESP method. The final charges used for compounds **3**, **5** and **7** are listed in the last column of the three Cartesian Coordinate Files, generated by InsightII. The three files (.arc format) describe the lowest energy conformation of **3** (**comp3.arc**), **5** (**comp5.arc**) and **7** (**comp7.arc**), the last containing also a minimized benzene molecule inside the cavity).

The conformational analysis of **3**, **5** and **7** was performed by the discontinuous method of simulated annealing,<sup>3S,5S</sup> which involves high-temperature molecular dynamics and subsequent energy minimizations of the collected structures. To secure a comprehensive sampling of the conformational space, different conformations of the calixarene moiety<sup>6S</sup> were used to generate few local minimum-energy geometries of every capped porphyrins, which, in turn, were considered as starting geometries in consecutive simulated annealing runs. Conformational changes of the calixarene macrocycle, in fact, are very low-frequency motions and occur with a very low probability during (single) molecular dynamics runs.<sup>5S</sup> One hundred geometries of each compound were generated at 2 ps intervals through a first 200 ps molecular dynamics sampling performed at 900 K. Each geometry was then minimized with the *Conjugate Gradients* algorithm of molecular mechanics till convergence (average derivative of 0.005 kcalmol<sup>-1</sup>Å<sup>-1</sup>). A second loop of MD/MM simulations, 2 ps for each conformer previously found followed by a further energy minimization, was performed at 600 K. A third loop of MD/MM simulations was performed at 300 K. The output geometries of the different runs were compared each other to evaluate the completeness of the search procedure on **3**, **5** and **7**. In all cases the same lowest energy conformation was obtained at least two times from different runs and was reasonably considered as the true global minimum.

Notably, the cone (flattened cone) was the unique geometry of the calixarene cap detected in conformations of **3**, **5** and **7** populated at room temperature.

The benzene molecule was manually located close to the center of the cavity of the lowest energy conformation of **7**, with the plane of the molecule roughly perpendicular to the plane of the porphyrin. The structure of the system was then refined by energy minimization until convergence (average derivative of 0.001 kcalmol<sup>-1</sup>Å<sup>-1</sup>).

## References

- 1S. Hoeltje, H.D.; Fattorusso, C. *Pharm. Acta Helv.* **1998**, *7*, 271-277.
- 2S. Kemmritz, K. **1994**, Ph.D Thesis, Freie Universität Berlin, Berlin, Germany.
- 3S. Wong, Y.-T.; Schubert, B.; Hoffman, R. *J. Am. Chem. Soc.* **1992**, *114*, 2367.
- 4S. Collman, J. P.; Herrmann, P. C.; Lei, F.; Eberspacher, T. A.; Eubanks, M.; Boitrel, B.; Hayoz, P.; Xumu, Z.; Brauman, J. I.; Day, V. W. *J. Am. Chem. Soc.* **1997**, *119*, 3481-3489.
- 5S. Kirkpatrick, S.; Gelatt, C.D.; Vecchi M.P. *Science* **1988**, *220*, 671.
- 6S. Botta, B.; Di Giovanni, M. C.; Delle Monache, G.; De Rosa, M. C.; Gacs-Baitz, E.; Botta, M.; Tafi, A.; Corelli, F.; Santini, A.; Benedetti, E.; Pedone, C.; Misiti, D. *J. Org. Chem.* **1994**, *59*, 1532.

**Table 1S.** Stretching parameters adapted to describe the porphyrin bonds h–c#, c]–cp and na–hn.

| Bond                | K (kcal/mol) | R <sub>0</sub> (Å) | original definition |
|---------------------|--------------|--------------------|---------------------|
| c# – h <sup>a</sup> | 363.4164     | 1.0800             | c5 – h              |

|                      |          |        |         |
|----------------------|----------|--------|---------|
| na – hn <sup>a</sup> | 483.4512 | 1.0260 | np – hn |
| c] – cp <sup>b</sup> | 280.0000 | 1.5200 | c= – cp |

<sup>a</sup> Parameter adapted from CVFF force field. <sup>b</sup> Parameter adapted from heme29 force field.

**Table 2S.** Bending parameters adapted to describe the porphyrin bonds h–c#, c]–cp and na–hn and the carbamate moiety of **7**.

| Angle                     | K <sub>Θ</sub> (kcal/mol) | Θ <sub>0</sub> (°) | CVFF definition |
|---------------------------|---------------------------|--------------------|-----------------|
| cp – c] – c <sup>a</sup>  | 90.0000                   | 120.0000           | cp – cp – c5    |
| c] – cp – cp <sup>a</sup> | 90.0000                   | 120.0000           | cp – cp – cp    |
| h – c# – c <sup>a</sup>   | 44.2000                   | 124.8000           | h – c5 – c5     |
| h – c# – c# <sup>a</sup>  | 44.2000                   | 128.1655           | h – c5 – c5     |
| c[ – na – hn <sup>a</sup> | 27.5000                   | 120.0000           | c5 – np – hn    |
| o – c' – n <sup>b</sup>   | 80.0000                   | 110.6000           | //              |

<sup>a</sup> Parameter adapted from CVFF force field. <sup>b</sup> Ref. 2S.

**Table 3S.** CVFF torsional parameter adapted to guarantee the planarity of the porphyrin system in the absence of a central metal ion.

| Torsion         | K <sub>Φ</sub> (kcal/mol) | Φ <sub>0</sub> (°) | n | CVFF definition |
|-----------------|---------------------------|--------------------|---|-----------------|
| * – c[ – c] – * | 12.0000                   | 180.0000           | 2 | * – cp – cp – * |

**Table 4S.** Adiabatic torsional potential curve (kcal/mol) calculated along the dihedral angle c]–cp using MOPAC-AM1.

|                | Dihedral angle (°) |      |      |      |      |     |     |     |     |     |     |     |      |
|----------------|--------------------|------|------|------|------|-----|-----|-----|-----|-----|-----|-----|------|
|                | 330                | 345  | 0    | 15   | 30   | 45  | 60  | 75  | 90  | 105 | 120 | 135 | 150  |
| E <sup>a</sup> | 12.8               | 46.6 | 74.9 | 46.3 | 12.8 | 1.0 | 0.0 | 0.2 | 0.4 | 0.2 | 0.0 | 1.1 | 12.9 |

<sup>a</sup> With respect to the lowest energy value found at 60°.

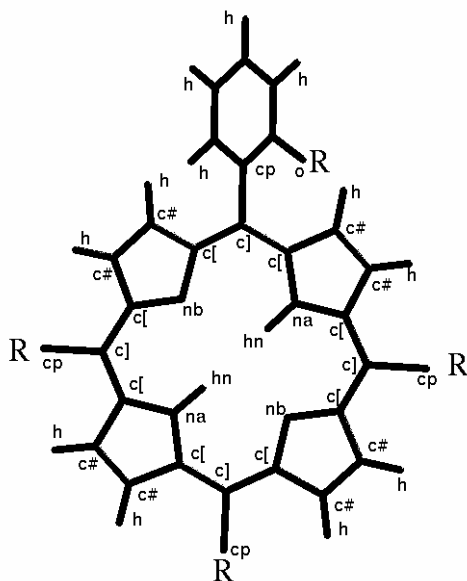

Figure 1S. Atom types used to describe the porphyrin ring of **3**, **5** and **7**. R's indicate the arms to the calixarene moiety.

**File: comp3.arc**

!BIOSYM archive 3

PBC=OFF

input file for discover

!DATE Sat Mar 27 18:59:42 1999

|      |              |              |              |      |    |    |   |        |
|------|--------------|--------------|--------------|------|----|----|---|--------|
| CBB  | 9.953779221  | 8.208243370  | -5.779032230 | MOL  | 1B | c2 | C | -0.010 |
| CAB  | 9.621101379  | 7.258158207  | -6.947474003 | MOL  | 1B | c2 | C | 0.070  |
| HAB1 | 10.473680496 | 7.273404121  | -7.651546478 | MOL  | 1B | h  | H | 0.010  |
| HAB2 | 8.782624245  | 7.661548615  | -7.546071529 | MOL  | 1B | h  | H | 0.020  |
| HBB1 | 10.665932655 | 7.732778072  | -5.078515530 | MOL  | 1B | h  | H | 0.030  |
| HBB2 | 10.485019684 | 9.092505455  | -6.175599098 | MOL  | 1B | h  | H | 0.030  |
| CBC  | 12.320784569 | -1.232420683 | -5.271371365 | MOL  | 1B | c2 | C | -0.010 |
| HBC1 | 13.370718002 | -1.355806112 | -5.592440605 | MOL  | 1B | h  | H | 0.030  |
| HBC2 | 11.983201981 | -2.249511003 | -4.999465942 | MOL  | 1B | h  | H | 0.030  |
| CAC  | 11.479991913 | -0.725033879 | -6.460532188 | MOL  | 1B | c2 | C | 0.070  |
| HAC1 | 11.980297089 | 0.154870570  | -6.902315617 | MOL  | 1B | h  | H | 0.010  |
| HAC2 | 11.517163277 | -1.481687188 | -7.265851021 | MOL  | 1B | h  | H | 0.020  |
| CBA  | 1.405778646  | 6.354598045  | -3.880638123 | MOL  | 1B | c2 | C | -0.010 |
| CAA  | 1.738275528  | 5.526158810  | -5.139552593 | MOL  | 1B | c2 | C | 0.070  |
| HAA1 | 1.133191228  | 4.601504803  | -5.152021408 | MOL  | 1B | h  | H | 0.010  |
| HAA2 | 1.383013368  | 6.085653305  | -6.024679661 | MOL  | 1B | h  | H | 0.020  |
| HBA1 | 0.406628191  | 6.804346085  | -4.027597904 | MOL  | 1B | h  | H | 0.030  |
| HBA2 | 2.090214968  | 7.218838692  | -3.803597927 | MOL  | 1B | h  | H | 0.030  |
| CBD  | 4.102876663  | -2.911131859 | -2.679450274 | MOL  | 1B | c2 | C | -0.010 |
| HBD1 | 3.504058361  | -3.816171646 | -2.470392227 | MOL  | 1B | h  | H | 0.030  |
| HBD2 | 3.802762747  | -2.181600571 | -1.903663397 | MOL  | 1B | h  | H | 0.030  |
| CAD  | 3.746843338  | -2.390871048 | -4.087526321 | MOL  | 1B | c2 | C | 0.070  |
| HAD1 | 4.226378441  | -3.015680790 | -4.864607811 | MOL  | 1B | h  | H | 0.020  |
| HAD2 | 2.666100264  | -2.558892488 | -4.250089645 | MOL  | 1B | h  | H | 0.010  |
| C4C  | 7.750946045  | -0.548801064 | -5.610194683 | FRAG | 1F | c[ | C | 0.060  |
| NC   | 8.075400352  | 0.788680673  | -5.754885674 | FRAG | 1F | na | N | -0.130 |
| HC   | 7.420065880  | 1.563749313  | -5.605353832 | FRAG | 1F | hn | H | 0.240  |
| C1C  | 9.415435791  | 0.942490935  | -6.060739994 | FRAG | 1F | c[ | C | 0.060  |
| C2C  | 9.987521172  | -0.402295768 | -6.162424088 | FRAG | 1F | c# | C | -0.100 |
| C3C  | 8.958057404  | -1.316934109 | -5.917161465 | FRAG | 1F | c# | C | -0.090 |
| CMC  | 9.076250076  | -2.856592178 | -5.922240257 | FRAG | 1F | c3 | C | 0.080  |
| HMC1 | 9.725834846  | -3.204952240 | -6.745806217 | FRAG | 1F | h  | H | 0.010  |
| HMC2 | 9.516028404  | -3.220485449 | -4.976319313 | FRAG | 1F | h  | H | 0.000  |
| HMC3 | 8.097239494  | -3.351721287 | -6.051856518 | FRAG | 1F | h  | H | 0.000  |
| CHC  | 10.072105408 | 2.185733080  | -6.249595165 | FRAG | 1F | c] | C | -0.020 |
| HHC  | 11.138222694 | 2.123337746  | -6.460865498 | FRAG | 1F | h  | H | 0.050  |
| C3D  | 3.159065008  | 0.177252620  | -4.190190792 | FRAG | 1D | c# | C | -0.110 |
| CMD  | 1.705554843  | 0.114895724  | -3.672437429 | FRAG | 1D | c3 | C | 0.090  |
| HMD1 | 1.528955579  | -0.779352307 | -3.047221184 | FRAG | 1D | h  | H | -0.010 |
| HMD2 | 1.460009575  | 0.995600939  | -3.051176548 | FRAG | 1D | h  | H | 0.000  |
| HMD3 | 0.989421189  | 0.085446395  | -4.513444424 | FRAG | 1D | h  | H | 0.000  |
| C4D  | 3.836976051  | 1.389537811  | -4.642292023 | FRAG | 1D | c[ | C | 0.030  |
| ND   | 5.140370846  | 1.043526649  | -4.965349674 | FRAG | 1D | nb | N | -0.290 |
| C1D  | 5.299880981  | -0.331771851 | -4.870475769 | FRAG | 1D | c[ | C | 0.040  |
| C2D  | 4.043804169  | -0.888538897 | -4.359990597 | FRAG | 1D | c# | C | -0.110 |
| CHD  | 6.482017994  | -1.039824963 | -5.209751606 | FRAG | 1D | c] | C | -0.020 |
| HHD  | 6.415813446  | -2.122072935 | -5.108056545 | FRAG | 1D | h  | H | 0.050  |
| C4A  | 5.495339394  | 5.361621857  | -5.865575314 | FRAG | 1C | c[ | C | 0.060  |
| C3A  | 4.231421947  | 6.096380234  | -5.810402393 | FRAG | 1C | c# | C | -0.090 |
| CMA  | 4.043968678  | 7.587321758  | -6.168352127 | FRAG | 1C | c3 | C | 0.080  |
| HMA1 | 4.148926735  | 8.222955704  | -5.270941257 | FRAG | 1C | h  | H | 0.000  |
| HMA2 | 4.783482552  | 7.930881977  | -6.913941383 | FRAG | 1C | h  | H | 0.000  |
| HMA3 | 3.043213844  | 7.779179573  | -6.596080780 | FRAG | 1C | h  | H | 0.010  |

|      |              |              |              |         |    |   |        |
|------|--------------|--------------|--------------|---------|----|---|--------|
| C2A  | 3.243971348  | 5.208381653  | -5.364894867 | FRAG 1C | c# | C | -0.100 |
| C1A  | 3.882316113  | 3.902634382  | -5.179278374 | FRAG 1C | c[ | C | 0.060  |
| NA   | 5.222206593  | 4.059336662  | -5.486151218 | FRAG 1C | na | N | -0.130 |
| HA   | 5.919513226  | 3.308077574  | -5.441453934 | FRAG 1C | hn | H | 0.240  |
| CHA  | 3.279165030  | 2.688342571  | -4.762842655 | FRAG 1C | c] | C | -0.020 |
| HHA  | 2.223298073  | 2.758190393  | -4.504902840 | FRAG 1C | h  | H | 0.050  |
| C4B  | 9.547173500  | 3.503470898  | -6.245411873 | FRAG 1E | c[ | C | 0.030  |
| C3B  | 10.274107933 | 4.741972446  | -6.514799595 | FRAG 1E | c# | C | -0.110 |
| CMB  | 11.793085098 | 4.847300053  | -6.773145199 | FRAG 1E | c3 | C | 0.090  |
| HMB1 | 12.362524986 | 4.122324944  | -6.163789272 | FRAG 1E | h  | H | -0.010 |
| HMB2 | 12.025545120 | 4.650043488  | -7.835235119 | FRAG 1E | h  | H | 0.000  |
| HMB3 | 12.180998802 | 5.851921558  | -6.523886681 | FRAG 1E | h  | H | 0.000  |
| C2B  | 9.337872505  | 5.774433613  | -6.573783875 | FRAG 1E | c# | C | -0.110 |
| C1B  | 8.028918266  | 5.190788269  | -6.264370441 | FRAG 1E | c[ | C | 0.040  |
| NB   | 8.220387459  | 3.838115692  | -6.020339489 | FRAG 1E | nb | N | -0.290 |
| CHB  | 6.776763439  | 5.857049465  | -6.219246864 | FRAG 1E | c] | C | -0.020 |
| HHB  | 6.810645580  | 6.917593479  | -6.464981079 | FRAG 1E | h  | H | 0.050  |
| C    | 11.344510078 | 7.314203739  | -1.687156796 | MOL 1G  | cp | C | -0.170 |
| HC   | 12.023727417 | 8.149147034  | -1.734043121 | MOL 1G  | h  | H | 0.060  |
| C1   | 9.983264923  | 7.551150799  | -1.483711123 | MOL 1G  | cp | C | 0.180  |
| C2   | 9.091181755  | 6.465598106  | -1.433847070 | MOL 1G  | cp | C | -0.100 |
| C3   | 9.587035179  | 5.168072224  | -1.612591743 | MOL 1G  | cp | C | 0.010  |
| H3   | 8.902361870  | 4.331512928  | -1.576469541 | MOL 1G  | h  | H | 0.060  |
| C4   | 10.960927963 | 4.923946381  | -1.726810813 | MOL 1G  | cp | C | -0.100 |
| C5   | 11.843477249 | 6.015318394  | -1.809803963 | MOL 1G  | cp | C | 0.180  |
| O    | 9.446820259  | 8.854256630  | -1.321315765 | MOL 1G  | o  | O | -0.310 |
| C6   | 7.557665825  | 6.689505100  | -1.169040680 | MOL 1G  | c1 | C | 0.080  |
| C7   | 6.723043919  | 6.832627773  | -2.483589411 | MOL 1G  | c2 | C | -0.010 |
| C8   | 7.058055878  | 8.028641701  | -3.391380787 | MOL 1G  | c2 | C | 0.170  |
| O1   | 8.279752731  | 7.757904530  | -4.109311104 | MOL 1G  | o  | O | -0.310 |
| C9   | 8.724376678  | 8.700860977  | -5.016513348 | MOL 1G  | c' | C | 0.350  |
| O2   | 8.207702637  | 9.801263809  | -5.224907398 | MOL 1G  | o' | O | -0.350 |
| H81  | 6.228924274  | 8.183213234  | -4.107097149 | MOL 1G  | h  | H | 0.020  |
| H82  | 7.137891293  | 8.960894585  | -2.799281359 | MOL 1G  | h  | H | 0.020  |
| H71  | 6.781812668  | 5.899583817  | -3.075443506 | MOL 1G  | h  | H | 0.010  |
| H72  | 5.654997826  | 6.930541992  | -2.211980581 | MOL 1G  | h  | H | 0.010  |
| H6   | 7.445536613  | 7.688491344  | -0.704600930 | MOL 1G  | h  | H | 0.040  |
| C12  | 11.514756203 | 3.456640720  | -1.659211755 | MOL 1G  | c1 | C | 0.080  |
| H12  | 12.541509628 | 3.564106226  | -1.256098866 | MOL 1G  | h  | H | 0.040  |
| C13  | 11.764388084 | 2.847377539  | -3.074638605 | MOL 1G  | c2 | C | -0.010 |
| H131 | 10.833322525 | 2.410571337  | -3.474977255 | MOL 1G  | h  | H | 0.010  |
| H132 | 12.021813393 | 3.641705036  | -3.800137758 | MOL 1G  | h  | H | 0.010  |
| C14  | 12.911714554 | 1.812078834  | -3.100627899 | MOL 1G  | c2 | C | 0.170  |
| O3   | 12.806179047 | 0.912783384  | -4.236338615 | MOL 1G  | o  | O | -0.310 |
| C15  | 12.297124863 | -0.361061752 | -4.010568619 | MOL 1G  | c' | C | 0.350  |
| O4   | 11.866955757 | -0.785228610 | -2.936134815 | MOL 1G  | o' | O | -0.350 |
| H141 | 13.874629021 | 2.351567030  | -3.166720390 | MOL 1G  | h  | H | 0.020  |
| H142 | 12.977617264 | 1.262059093  | -2.139936686 | MOL 1G  | h  | H | 0.020  |
| O5   | 13.219860077 | 5.732065201  | -2.008915663 | MOL 1G  | o  | O | -0.310 |
| C18  | 10.171814919 | 10.070731163 | -1.611131310 | MOL 1G  | c3 | C | 0.220  |
| C19  | 14.249691010 | 6.738998413  | -2.131000519 | MOL 1G  | c3 | C | 0.220  |
| C20  | 6.844657421  | 5.008755684  | 2.251428127  | MOL 1G  | cp | C | -0.170 |
| H20  | 7.135569096  | 5.105801105  | 3.285262585  | MOL 1G  | h  | H | 0.070  |

|      |              |              |              |     |    |    |   |        |
|------|--------------|--------------|--------------|-----|----|----|---|--------|
| C21  | 7.363033772  | 5.876664162  | 1.285785794  | MOL | 1G | cp | C | 0.180  |
| C22  | 6.963733673  | 5.741426945  | -0.057592515 | MOL | 1G | cp | C | -0.110 |
| C23  | 6.041395187  | 4.741863251  | -0.389846981 | MOL | 1G | cp | C | 0.010  |
| H23  | 5.756036758  | 4.615353107  | -1.422015309 | MOL | 1G | h  | H | 0.060  |
| C24  | 5.493844986  | 3.892194748  | 0.576909006  | MOL | 1G | cp | C | -0.110 |
| C25  | 5.932347298  | 4.015717506  | 1.904900908  | MOL | 1G | cp | C | 0.180  |
| O6   | 8.284481049  | 6.910197258  | 1.591470480  | MOL | 1G | o  | O | -0.310 |
| C26  | 4.446226597  | 2.779328585  | 0.184002236  | MOL | 1G | c1 | C | 0.080  |
| C27  | 3.626490116  | 2.978083849  | -1.129242063 | MOL | 1G | c2 | C | -0.010 |
| C28  | 2.646642447  | 4.169015884  | -1.071957350 | MOL | 1G | c2 | C | 0.170  |
| O7   | 2.378785610  | 4.673464298  | -2.399954796 | MOL | 1G | o  | O | -0.310 |
| C29  | 1.382561564  | 5.632348061  | -2.524827719 | MOL | 1G | c' | C | 0.350  |
| O8   | 0.564547300  | 5.931391716  | -1.651800275 | MOL | 1G | o' | O | -0.350 |
| H281 | 1.715819716  | 3.847842932  | -0.563826203 | MOL | 1G | h  | H | 0.020  |
| H282 | 3.062309980  | 4.991409302  | -0.457870692 | MOL | 1G | h  | H | 0.020  |
| H271 | 4.313677311  | 3.077949286  | -1.989070058 | MOL | 1G | h  | H | 0.010  |
| H272 | 3.035264969  | 2.071295023  | -1.358842492 | MOL | 1G | h  | H | 0.010  |
| H26  | 3.679237843  | 2.880282402  | 0.977301598  | MOL | 1G | h  | H | 0.040  |
| O9   | 5.375344276  | 3.198856354  | 2.907294035  | MOL | 1G | o  | O | -0.310 |
| C32  | 8.611270905  | 7.331881046  | 2.934735775  | MOL | 1G | c3 | C | 0.220  |
| C33  | 6.251036644  | 2.267380476  | 3.581711054  | MOL | 1G | c3 | C | 0.220  |
| C34  | 4.839269161  | -0.933971226 | 1.178151369  | MOL | 1G | cp | C | -0.170 |
| H34  | 4.276412487  | -1.696606040 | 1.690235734  | MOL | 1G | h  | H | 0.060  |
| C35  | 4.255809307  | 0.315552711  | 0.951657951  | MOL | 1G | cp | C | 0.180  |
| C36  | 4.997244835  | 1.316372156  | 0.300926685  | MOL | 1G | cp | C | -0.100 |
| C37  | 6.276446819  | 1.012705445  | -0.178781256 | MOL | 1G | cp | C | 0.010  |
| H37  | 6.838918209  | 1.771576285  | -0.705876589 | MOL | 1G | h  | H | 0.060  |
| C38  | 6.881661892  | -0.218669578 | 0.092395283  | MOL | 1G | cp | C | -0.100 |
| C39  | 6.147098064  | -1.207785726 | 0.769204378  | MOL | 1G | cp | C | 0.180  |
| O10  | 2.934088707  | 0.637472808  | 1.354653955  | MOL | 1G | o  | O | -0.310 |
| C40  | 8.364931107  | -0.469500333 | -0.362967849 | MOL | 1G | c1 | C | 0.080  |
| H40  | 8.752811432  | -1.325647593 | 0.222568870  | MOL | 1G | h  | H | 0.040  |
| C41  | 8.452717781  | -0.990467012 | -1.833132148 | MOL | 1G | c2 | C | -0.010 |
| H411 | 8.068211555  | -0.226558015 | -2.535197973 | MOL | 1G | h  | H | 0.010  |
| H412 | 9.518398285  | -1.107597113 | -2.094672441 | MOL | 1G | h  | H | 0.010  |
| C42  | 7.780698776  | -2.342736006 | -2.131476879 | MOL | 1G | c2 | C | 0.170  |
| H421 | 8.169356346  | -2.736280918 | -3.088885546 | MOL | 1G | h  | H | 0.020  |
| H422 | 8.046091080  | -3.089448929 | -1.358050466 | MOL | 1G | h  | H | 0.020  |
| O11  | 6.349570751  | -2.167133093 | -2.221385479 | MOL | 1G | o  | O | -0.310 |
| C43  | 5.577585697  | -3.277536392 | -2.510308266 | MOL | 1G | c' | C | 0.350  |
| O12  | 5.993973732  | -4.431074142 | -2.642513752 | MOL | 1G | o' | O | -0.350 |
| O13  | 6.781246662  | -2.454970598 | 1.000952005  | MOL | 1G | o  | O | -0.310 |
| C45  | 2.041496515  | -0.280571699 | 2.025116205  | MOL | 1G | c3 | C | 0.220  |
| C46  | 6.089675903  | -3.645414352 | 1.440137506  | MOL | 1G | c3 | C | 0.220  |
| C47  | 9.978766441  | 1.491697073  | -0.920771480 | MOL | 1G | cp | C | 0.010  |
| H47  | 9.772789955  | 1.307253838  | -1.962932825 | MOL | 1G | h  | H | 0.060  |
| C48  | 10.834077835 | 2.543093204  | -0.567550659 | MOL | 1G | cp | C | -0.110 |
| C49  | 11.034871101 | 2.815826178  | 0.795385003  | MOL | 1G | cp | C | 0.180  |
| O14  | 11.912079811 | 3.846286535  | 1.186487079  | MOL | 1G | o  | O | -0.310 |
| C50  | 11.353687286 | 4.974038601  | 1.897564054  | MOL | 1G | c3 | C | 0.220  |
| H501 | 10.927267075 | 4.676371098  | 2.873733044  | MOL | 1G | h  | H | -0.020 |
| H502 | 12.137347221 | 5.727371216  | 2.093658209  | MOL | 1G | h  | H | -0.010 |
| H503 | 10.560150146 | 5.471180916  | 1.309116602  | MOL | 1G | h  | H | 0.020  |





**File: comp5.arc**

!BIOSYM archive 3

PBC=OFF

input file for discover

!DATE Sat Mar 27 19:02:16 1999

|     |              |              |               |         |    |   |        |
|-----|--------------|--------------|---------------|---------|----|---|--------|
| N1  | 1.516549349  | 2.088668585  | -8.191767693  | PYRO 1  | na | N | -0.130 |
| H1  | 0.799829125  | 2.558738470  | -8.752102852  | PYRO 1  | hn | H | 0.310  |
| C2  | 2.684848309  | 2.701989174  | -7.746034622  | PYRO 1  | c[ | C | 0.030  |
| C3  | 3.404689074  | 1.667423844  | -7.017878532  | PYRO 1  | c# | C | -0.140 |
| H3  | 4.359533310  | 1.789911628  | -6.526276112  | PYRO 1  | h  | H | 0.150  |
| C4  | 2.646595478  | 0.536696017  | -6.993868351  | PYRO 1  | c# | C | -0.140 |
| H4  | 2.907335281  | -0.381614208 | -6.486671925  | PYRO 1  | h  | H | 0.150  |
| C5  | 1.410659790  | 0.782313108  | -7.722136497  | PYRO 1  | c[ | C | 0.030  |
| C1  | 3.076448679  | 4.067291260  | -7.953985691  | PYRO 1  | c] | C | 0.020  |
| C51 | 0.311016798  | -0.119931854 | -7.913074493  | PYRO 1  | c] | C | 0.020  |
| C1  | -4.598205566 | -0.517932057 | -13.931571960 | FRAG 1C | cp | C | -0.160 |
| C2  | -5.834358692 | 0.116229944  | -13.998706818 | FRAG 1C | cp | C | -0.090 |
| C3  | -6.059982300 | 1.281760812  | -13.273349762 | FRAG 1C | cp | C | -0.200 |
| H3  | -7.015043259 | 1.782379746  | -13.328432083 | FRAG 1C | h  | H | 0.130  |
| C4  | -5.054732323 | 1.814464569  | -12.467465401 | FRAG 1C | cp | C | 0.110  |
| C5  | -3.794175386 | 1.189076304  | -12.407153130 | FRAG 1C | cp | C | -0.060 |
| C6  | -3.582633972 | 0.014145114  | -13.142230034 | FRAG 1C | cp | C | -0.080 |
| H1  | -4.423787117 | -1.422452092 | -14.496716499 | FRAG 1C | h  | H | 0.130  |
| H2  | -6.619353771 | -0.294203550 | -14.618880272 | FRAG 1C | h  | H | 0.130  |
| H6  | -2.622519493 | -0.482660770 | -13.100257874 | FRAG 1C | h  | H | 0.140  |
| C   | 0.274774492  | -2.723214865 | -5.023519516  | FRAG 1I | cp | C | -0.200 |
| C1  | 0.247912019  | -1.504694939 | -5.704730511  | FRAG 1I | cp | C | 0.110  |
| C3  | 0.339836121  | -1.484814644 | -7.109827995  | FRAG 1I | cp | C | -0.060 |
| C4  | 0.434021175  | -2.698377371 | -7.804821014  | FRAG 1I | cp | C | -0.080 |
| C5  | 0.445703536  | -3.907306433 | -7.115418911  | FRAG 1I | cp | C | -0.160 |
| C6  | 0.366976053  | -3.919817686 | -5.726935387  | FRAG 1I | cp | C | -0.090 |
| HC  | 0.233538225  | -2.729173660 | -3.944774866  | FRAG 1I | h  | H | 0.130  |
| H4  | 0.495536685  | -2.697823048 | -8.884866714  | FRAG 1I | h  | H | 0.140  |
| H5  | 0.519525945  | -4.837698936 | -7.660287857  | FRAG 1I | h  | H | 0.130  |
| H6  | 0.385681748  | -4.859966278 | -5.192971230  | FRAG 1I | h  | H | 0.130  |
| C   | -3.372488499 | 4.672362328  | -2.401014328  | MOL 1B  | cp | C | -0.270 |
| HC  | -4.041712284 | 5.102795124  | -1.673929691  | MOL 1B  | h  | H | 0.130  |
| C1  | -2.185764074 | 5.327525139  | -2.716988802  | MOL 1B  | cp | C | 0.140  |
| C2  | -1.274151564 | 4.745968819  | -3.617390156  | MOL 1B  | cp | C | -0.110 |
| C3  | -1.609705448 | 3.521282196  | -4.210403919  | MOL 1B  | cp | C | -0.050 |
| H3  | -0.937404633 | 3.087975025  | -4.933930874  | MOL 1B  | h  | H | 0.140  |
| C4  | -2.805870771 | 2.857345343  | -3.906497240  | MOL 1B  | cp | C | -0.110 |
| C5  | -3.699533224 | 3.461907387  | -3.004631042  | MOL 1B  | cp | C | 0.140  |
| O   | -1.866225958 | 6.535926342  | -2.064613581  | MOL 1B  | o  | O | -0.240 |
| C6  | 0.063018329  | 5.498229504  | -3.981838942  | MOL 1B  | c1 | C | 0.010  |
| C7  | -3.187978268 | 1.493160248  | -4.600253105  | MOL 1B  | c1 | C | 0.010  |
| O1  | -4.894021988 | 2.806798220  | -2.642189026  | MOL 1B  | o  | O | -0.240 |
| C8  | -2.685525894 | 7.694980145  | -2.350179195  | MOL 1B  | c3 | C | -0.050 |
| C9  | -5.830535412 | 2.893103838  | -10.424988747 | MOL 1B  | c2 | C | 0.010  |
| H91 | -6.927113533 | 3.037614822  | -10.443388939 | MOL 1B  | h  | H | 0.080  |
| H92 | -5.658415318 | 1.887543201  | -9.987818718  | MOL 1B  | h  | H | 0.080  |
| O2  | -5.315426826 | 3.006321669  | -11.771379471 | MOL 1B  | o  | O | -0.250 |
| C10 | -2.844489336 | 8.374520302  | -10.073152542 | MOL 1B  | c2 | C | 0.010  |

|      |              |              |               |     |    |    |   |        |
|------|--------------|--------------|---------------|-----|----|----|---|--------|
| H101 | -3.892698526 | 8.070676804  | -9.896018028  | MOL | 1B | h  | H | 0.080  |
| H102 | -2.871423483 | 9.479020119  | -10.147896767 | MOL | 1B | h  | H | 0.080  |
| C11  | -6.144998074 | 3.425331593  | -3.027801037  | MOL | 1B | c3 | C | -0.050 |
| C12  | 0.203446075  | 9.241258621  | -4.977460384  | MOL | 1B | cp | C | -0.260 |
| H12  | 0.709995151  | 10.138628960 | -4.669758320  | MOL | 1B | h  | H | 0.130  |
| C13  | 0.493157715  | 8.036752701  | -4.330565453  | MOL | 1B | cp | C | 0.130  |
| C14  | -0.158282429 | 6.859134197  | -4.738283634  | MOL | 1B | cp | C | -0.110 |
| C15  | -1.063124418 | 6.915750027  | -5.804695129  | MOL | 1B | cp | C | -0.070 |
| H15  | -1.566948771 | 6.011626244  | -6.118021965  | MOL | 1B | h  | H | 0.140  |
| C16  | -1.406503916 | 8.132473946  | -6.404745579  | MOL | 1B | cp | C | -0.110 |
| C17  | -0.740340650 | 9.304437637  | -6.006442547  | MOL | 1B | cp | C | 0.130  |
| O3   | 1.422482371  | 7.940169811  | -3.261329412  | MOL | 1B | o  | O | -0.230 |
| C18  | 2.602552176  | 5.253433228  | -4.622241497  | MOL | 1B | c2 | C | 0.010  |
| H181 | 2.623072147  | 6.140499592  | -5.288989067  | MOL | 1B | h  | H | 0.080  |
| H182 | 2.868206024  | 5.620226383  | -3.613061428  | MOL | 1B | h  | H | 0.080  |
| C19  | -2.545957327 | 8.172735214  | -7.480269432  | MOL | 1B | c1 | C | 0.010  |
| O4   | -1.068592668 | 10.510996819 | -6.680232525  | MOL | 1B | o  | O | -0.230 |
| C20  | 2.185366869  | 9.049370766  | -2.731599331  | MOL | 1B | c3 | C | -0.050 |
| C21  | -0.452709317 | 11.792814255 | -6.414277077  | MOL | 1B | c3 | C | -0.050 |
| C22  | -5.818145752 | 7.160202026  | -5.668516636  | MOL | 1B | cp | C | -0.270 |
| H22  | -6.436865330 | 7.527440071  | -4.868984222  | MOL | 1B | h  | H | 0.130  |
| C23  | -4.669577599 | 7.869746685  | -6.027560234  | MOL | 1B | cp | C | 0.140  |
| C24  | -3.852930784 | 7.388895035  | -7.066981792  | MOL | 1B | cp | C | -0.110 |
| C25  | -4.209131241 | 6.198118210  | -7.711301804  | MOL | 1B | cp | C | -0.050 |
| H25  | -3.566632748 | 5.805341721  | -8.483559608  | MOL | 1B | h  | H | 0.140  |
| C26  | -5.370913982 | 5.494810581  | -7.371920586  | MOL | 1B | cp | C | -0.110 |
| C27  | -6.181729794 | 5.985532284  | -6.331621170  | MOL | 1B | cp | C | 0.140  |
| O5   | -4.280216217 | 9.079239845  | -5.393523216  | MOL | 1B | o  | O | -0.240 |
| C28  | -5.762751579 | 4.164722919  | -8.125751495  | MOL | 1B | c1 | C | 0.010  |
| O6   | -7.354199409 | 5.251347542  | -6.011512756  | MOL | 1B | o  | O | -0.240 |
| C29  | -5.073036194 | 9.781719208  | -4.407997608  | MOL | 1B | c3 | C | -0.050 |
| C30  | -8.369710922 | 5.689733028  | -5.079071045  | MOL | 1B | c3 | C | -0.050 |
| C31  | -6.591938972 | 0.838930190  | -6.316513538  | MOL | 1B | cp | C | -0.260 |
| H31  | -7.394897461 | 0.125334889  | -6.264987946  | MOL | 1B | h  | H | 0.130  |
| C32  | -5.459634304 | 0.651794493  | -5.518904686  | MOL | 1B | cp | C | 0.130  |
| C33  | -4.414341450 | 1.589836121  | -5.573685646  | MOL | 1B | cp | C | -0.110 |
| C34  | -4.502319813 | 2.656839132  | -6.475622177  | MOL | 1B | cp | C | -0.070 |
| H34  | -3.693345547 | 3.372668505  | -6.526941776  | MOL | 1B | h  | H | 0.140  |
| C35  | -5.656483650 | 2.874318600  | -7.235841751  | MOL | 1B | cp | C | -0.110 |
| C36  | -6.708283901 | 1.943700314  | -7.164868832  | MOL | 1B | cp | C | 0.130  |
| O7   | -5.308577061 | -0.451405257 | -4.637486458  | MOL | 1B | o  | O | -0.230 |
| O8   | -7.854064941 | 2.179383755  | -7.970128536  | MOL | 1B | o  | O | -0.230 |
| C37  | -6.289770603 | -1.499111652 | -4.457555294  | MOL | 1B | c3 | C | -0.050 |
| C38  | -8.969188690 | 1.266264081  | -8.096915245  | MOL | 1B | c3 | C | -0.050 |
| C39  | -0.998746693 | 0.092827335  | -4.281688213  | MOL | 1B | c2 | C | 0.010  |
| H391 | -0.719506681 | 0.858005643  | -3.533985853  | MOL | 1B | h  | H | 0.080  |
| H392 | -1.416414499 | -0.747223258 | -3.693376064  | MOL | 1B | h  | H | 0.080  |
| O9   | 0.208611250  | -0.295659542 | -4.980391026  | MOL | 1B | o  | O | -0.250 |
| C40  | -2.051794291 | 0.657530606  | -5.261823654  | MOL | 1B | c2 | C | -0.150 |
| O10  | 3.551643133  | 4.237909794  | -5.021842957  | MOL | 1B | o  | O | -0.250 |
| C41  | 1.194022655  | 4.637201309  | -4.627815247  | MOL | 1B | c2 | C | -0.150 |
| C42  | -5.151320457 | 3.958001614  | -9.547816277  | MOL | 1B | c2 | C | -0.150 |
| O11  | -2.419066429 | 7.768826485  | -11.317434311 | MOL | 1B | o  | O | -0.250 |

|      |              |              |               |      |    |    |   |        |
|------|--------------|--------------|---------------|------|----|----|---|--------|
| C43  | -1.948697329 | 7.922686577  | -8.897607803  | MOL  | 1B | c2 | C | -0.150 |
| H6   | 0.466932774  | 5.745563984  | -2.979631901  | MOL  | 1B | h  | H | 0.110  |
| H7   | -3.516411304 | 0.868256092  | -3.745598793  | MOL  | 1B | h  | H | 0.110  |
| H81  | -2.271372080 | 8.588328362  | -1.850184441  | MOL  | 1B | h  | H | 0.060  |
| H82  | -2.716127872 | 7.911774158  | -3.436022520  | MOL  | 1B | h  | H | 0.110  |
| H83  | -3.724193335 | 7.562149525  | -1.995479345  | MOL  | 1B | h  | H | 0.060  |
| H111 | -6.993263245 | 2.769080639  | -2.764394999  | MOL  | 1B | h  | H | 0.060  |
| H112 | -6.298888206 | 4.394494534  | -2.518476725  | MOL  | 1B | h  | H | 0.060  |
| H113 | -6.191909313 | 3.598491430  | -4.120891094  | MOL  | 1B | h  | H | 0.110  |
| H19  | -2.893040657 | 9.224073410  | -7.528677464  | MOL  | 1B | h  | H | 0.110  |
| H201 | 2.835349321  | 9.496987343  | -3.506307125  | MOL  | 1B | h  | H | 0.060  |
| H202 | 2.835728168  | 8.707666397  | -1.906343937  | MOL  | 1B | h  | H | 0.110  |
| H203 | 1.522459745  | 9.837911606  | -2.329628944  | MOL  | 1B | h  | H | 0.060  |
| H211 | -0.872490048 | 12.565994263 | -7.082492352  | MOL  | 1B | h  | H | 0.060  |
| H212 | 0.639046311  | 11.758320808 | -6.587570190  | MOL  | 1B | h  | H | 0.060  |
| H213 | -0.633103549 | 12.117153168 | -5.372650146  | MOL  | 1B | h  | H | 0.110  |
| H28  | -6.838645458 | 4.326380730  | -8.336964607  | MOL  | 1B | h  | H | 0.110  |
| H291 | -6.059644699 | 10.069570541 | -4.816272259  | MOL  | 1B | h  | H | 0.060  |
| H292 | -5.234015942 | 9.164387703  | -3.504997015  | MOL  | 1B | h  | H | 0.060  |
| H293 | -4.558036327 | 10.706876755 | -4.092488766  | MOL  | 1B | h  | H | 0.110  |
| H301 | -8.806163788 | 6.658454418  | -5.385668278  | MOL  | 1B | h  | H | 0.060  |
| H302 | -9.190560341 | 4.951483727  | -5.034286022  | MOL  | 1B | h  | H | 0.110  |
| H303 | -7.960572243 | 5.796985149  | -4.057589531  | MOL  | 1B | h  | H | 0.060  |
| H371 | -5.931191444 | -2.236737967 | -3.717258930  | MOL  | 1B | h  | H | 0.110  |
| H372 | -7.248793602 | -1.092465401 | -4.086338520  | MOL  | 1B | h  | H | 0.060  |
| H373 | -6.479338646 | -2.039722919 | -5.403451443  | MOL  | 1B | h  | H | 0.060  |
| H381 | -9.477930069 | 1.114770412  | -7.126880646  | MOL  | 1B | h  | H | 0.060  |
| H382 | -9.715004921 | 1.668054938  | -8.806052208  | MOL  | 1B | h  | H | 0.060  |
| H383 | -8.640892029 | 0.281681329  | -8.479427338  | MOL  | 1B | h  | H | 0.110  |
| H401 | -2.479552507 | -0.202305093 | -5.812598228  | MOL  | 1B | h  | H | 0.090  |
| H402 | -1.557059646 | 1.257173896  | -6.047597408  | MOL  | 1B | h  | H | 0.090  |
| H411 | 1.258351445  | 3.669616222  | -4.094749451  | MOL  | 1B | h  | H | 0.090  |
| H412 | 0.925866246  | 4.376905918  | -5.669156075  | MOL  | 1B | h  | H | 0.090  |
| H421 | -4.074562550 | 3.716032743  | -9.468898773  | MOL  | 1B | h  | H | 0.090  |
| H422 | -5.192969322 | 4.915738583  | -10.100584030 | MOL  | 1B | h  | H | 0.090  |
| H431 | -1.682544112 | 6.855852604  | -9.010438919  | MOL  | 1B | h  | H | 0.090  |
| H432 | -0.981033087 | 8.450414658  | -9.002273560  | MOL  | 1B | h  | H | 0.090  |
| C1   | -0.119801022 | 7.480042458  | -12.088304520 | FRAG | 1G | cp | C | -0.060 |
| C2   | -1.285517931 | 8.264477730  | -11.993980408 | FRAG | 1G | cp | C | 0.110  |
| C3   | -1.344929576 | 9.501712799  | -12.638433456 | FRAG | 1G | cp | C | -0.200 |
| C4   | -0.249463007 | 9.975099564  | -13.353302002 | FRAG | 1G | cp | C | -0.090 |
| C5   | 0.908887744  | 9.210303307  | -13.440199852 | FRAG | 1G | cp | C | -0.160 |
| C6   | 0.975130141  | 7.969264984  | -12.813830376 | FRAG | 1G | cp | C | -0.080 |
| H3   | -2.252051830 | 10.084556580 | -12.586081505 | FRAG | 1G | h  | H | 0.130  |
| H4   | -0.301592410 | 10.935015678 | -13.848460197 | FRAG | 1G | h  | H | 0.130  |
| H5   | 1.758375168  | 9.578561783  | -13.997644424 | FRAG | 1G | h  | H | 0.130  |
| H6   | 1.880171061  | 7.381064415  | -12.886280060 | FRAG | 1G | h  | H | 0.140  |
| C1   | 4.430514812  | 4.554351807  | -7.291650295  | FRAG | 1H | cp | C | -0.060 |
| C2   | 5.504141331  | 4.928586483  | -8.111967087  | FRAG | 1H | cp | C | -0.080 |
| C3   | 6.708750725  | 5.345509529  | -7.552853584  | FRAG | 1H | cp | C | -0.160 |
| C4   | 6.857107162  | 5.391949654  | -6.170638084  | FRAG | 1H | cp | C | -0.090 |
| C5   | 5.799980164  | 5.025912762  | -5.343618393  | FRAG | 1H | cp | C | -0.200 |
| C6   | 4.584098339  | 4.621951103  | -5.893183708  | FRAG | 1H | cp | C | 0.110  |

|     |              |              |               |         |    |   |        |
|-----|--------------|--------------|---------------|---------|----|---|--------|
| H2  | 5.399418354  | 4.890382290  | -9.188037872  | FRAG 1H | h  | H | 0.140  |
| H3  | 7.531149864  | 5.628985405  | -8.194129944  | FRAG 1H | h  | H | 0.130  |
| H4  | 7.796205044  | 5.708643436  | -5.738121986  | FRAG 1H | h  | H | 0.130  |
| H5  | 5.912418842  | 5.052931786  | -4.270101547  | FRAG 1H | h  | H | 0.130  |
| C4C | -0.818659723 | 0.126433671  | -8.768047333  | PORN 1D | c[ | C | -0.020 |
| C3  | -2.028510332 | -0.675774336 | -8.867758751  | PORN 1D | c# | C | -0.160 |
| C4  | -2.813456297 | -0.166499227 | -9.847313881  | PORN 1D | c# | C | -0.160 |
| C4A | -2.154171944 | 0.994944751  | -10.420742035 | PORN 1D | c[ | C | -0.020 |
| N4B | -0.991490185 | 1.182773709  | -9.667351723  | PORN 1D | nb | N | -0.230 |
| CB  | -2.616572857 | 1.783052683  | -11.529685020 | PORN 1D | c] | C | 0.020  |
| C6C | -2.079091549 | 3.058429241  | -11.910526276 | PORN 1D | c[ | C | 0.030  |
| C5  | -2.453466892 | 3.880447865  | -13.052015305 | PORN 1D | c# | C | -0.140 |
| C6  | -1.759221077 | 5.050372124  | -12.999072075 | PORN 1D | c# | C | -0.140 |
| C6A | -0.890726030 | 5.030436516  | -11.831363678 | PORN 1D | c[ | C | 0.030  |
| N6B | -1.089296341 | 3.781404734  | -11.249400139 | PORN 1D | na | N | -0.130 |
| H6B | -0.609738886 | 3.457504272  | -10.404500961 | PORN 1D | hn | H | 0.310  |
| CC  | -0.019730004 | 6.072771072  | -11.368145943 | PORN 1D | c] | C | 0.020  |
| C8C | 0.926111937  | 5.939445972  | -10.293264389 | PORN 1D | c[ | C | -0.020 |
| C7  | 1.710193276  | 7.002923965  | -9.683720589  | PORN 1D | c# | C | -0.160 |
| C8  | 2.550725460  | 6.460189819  | -8.770391464  | PORN 1D | c# | C | -0.160 |
| H8  | 3.273160458  | 7.008253574  | -8.182733536  | PORN 1D | h  | H | 0.140  |
| C8A | 2.341360092  | 5.022379398  | -8.736211777  | PORN 1D | c[ | C | -0.020 |
| N8B | 1.280422091  | 4.771558285  | -9.611373901  | PORN 1D | nb | N | -0.230 |
| H3  | -2.255337477 | -1.555799842 | -8.283425331  | PORN 1D | h  | H | 0.140  |
| H4  | -3.762437820 | -0.575379610 | -10.163124084 | PORN 1D | h  | H | 0.140  |
| H5  | -3.202923059 | 3.631676197  | -13.790121078 | PORN 1D | h  | H | 0.150  |
| H6  | -1.865457058 | 5.873695374  | -13.691422462 | PORN 1D | h  | H | 0.150  |
| H7  | 1.662285447  | 8.051786423  | -9.938494682  | PORN 1D | h  | H | 0.140  |
| end |              |              |               |         |    |   |        |
| end |              |              |               |         |    |   |        |

**File: comp7.arc**

!BIOSYM archive 3

PBC=OFF

input file for discover

!DATE 10-Mar-99 time 17:34:53

|     |              |              |               |         |    |   |        |
|-----|--------------|--------------|---------------|---------|----|---|--------|
| C1  | 5.258283185  | 1.841607885  | -8.527492566  | BENZ 1  | cp | C | -0.100 |
| H11 | 4.301954491  | 2.337926431  | -8.498618222  | BENZ 1  | h  | H | 0.100  |
| C2  | 6.449584424  | 2.567430586  | -8.506359980  | BENZ 1  | cp | C | -0.100 |
| H21 | 6.426539819  | 3.644943120  | -8.460375142  | BENZ 1  | h  | H | 0.100  |
| C3  | 7.670752567  | 1.893858270  | -8.545764509  | BENZ 1  | cp | C | -0.100 |
| H31 | 8.605145820  | 2.430802548  | -8.530660600  | BENZ 1  | h  | H | 0.100  |
| C4  | 7.701026427  | 0.508042110  | -8.606347601  | BENZ 1  | cp | C | -0.100 |
| H41 | 8.646933183  | -0.011476675 | -8.635679200  | BENZ 1  | h  | H | 0.100  |
| C5  | 6.508753570  | -0.205392794 | -8.626780774  | BENZ 1  | cp | C | -0.100 |
| H51 | 6.531697185  | -1.275590856 | -8.673419329  | BENZ 1  | h  | H | 0.100  |
| C6  | 5.287123254  | 0.455681874  | -8.587373662  | BENZ 1  | cp | C | -0.100 |
| H61 | 4.364256429  | -0.104291978 | -8.605626020  | BENZ 1  | h  | H | 0.100  |
| end |              |              |               |         |    |   |        |
| N1  | 8.523611519  | -2.845995846 | -9.726977302  | PYRO 1  | na | N | -0.170 |
| H1  | 7.608164703  | -2.909075228 | -9.266697261  | PYRO 1  | hn | H | 0.260  |
| C2  | 8.694589853  | -2.637516927 | -11.095042878 | PYRO 1  | c[ | C | 0.040  |
| C3  | 10.136251253 | -2.598045881 | -11.297741422 | PYRO 1  | c# | C | -0.070 |
| H3  | 10.643158463 | -2.473628488 | -12.243563275 | PYRO 1  | h  | H | 0.090  |
| C4  | 10.749626717 | -2.630099443 | -10.088594628 | PYRO 1  | c# | C | -0.070 |
| H4  | 11.814350376 | -2.532530712 | -9.934092764  | PYRO 1  | h  | H | 0.090  |
| C5  | 9.734929966  | -2.721035703 | -9.047377057  | PYRO 1  | c[ | C | 0.040  |
| C1  | 7.676611117  | -2.506462806 | -12.097860566 | PYRO 1  | c] | C | 0.000  |
| C51 | 9.945312110  | -2.655164646 | -7.629000427  | PYRO 1  | c] | C | 0.000  |
| C1  | 4.720100534  | -4.014675306 | -1.767158696  | FRAG 1C | cp | C | -0.080 |
| C2  | 4.132010322  | -2.908206257 | -1.174963512  | FRAG 1C | cp | C | -0.020 |
| C3  | 3.955870430  | -1.738888051 | -1.902931107  | FRAG 1C | cp | C | -0.070 |
| H3  | 3.494897091  | -0.905742768 | -1.397068965  | FRAG 1C | h  | H | 0.090  |
| C4  | 4.367028491  | -1.652183042 | -3.244674138  | FRAG 1C | cp | C | 0.170  |
| C5  | 4.962002786  | -2.792637034 | -3.846491817  | FRAG 1C | cp | C | -0.100 |
| C6  | 5.132453050  | -3.960764866 | -3.090319964  | FRAG 1C | cp | C | -0.010 |
| H1  | 4.857492872  | -4.922240862 | -1.197356504  | FRAG 1C | h  | H | 0.060  |
| H2  | 3.811715001  | -2.955436486 | -0.143886934  | FRAG 1C | h  | H | 0.070  |
| H6  | 5.587393853  | -4.837214410 | -3.532360326  | FRAG 1C | h  | H | 0.070  |
| C   | 13.382297948 | -1.249205653 | -6.388431528  | FRAG 1I | cp | C | -0.070 |
| C1  | 12.025571587 | -1.272734098 | -6.754838322  | FRAG 1I | cp | C | 0.170  |
| C3  | 11.446473456 | -2.511696324 | -7.134753843  | FRAG 1I | cp | C | -0.100 |
| C4  | 12.234240314 | -3.670716207 | -7.132710557  | FRAG 1I | cp | C | -0.010 |
| C5  | 13.570673095 | -3.617227661 | -6.764019712  | FRAG 1I | cp | C | -0.080 |
| C6  | 14.144149165 | -2.410425031 | -6.393956463  | FRAG 1I | cp | C | -0.020 |
| HC  | 13.865816254 | -0.335553284 | -6.079528100  | FRAG 1I | h  | H | 0.090  |
| H4  | 11.809559913 | -4.621713283 | -7.425323885  | FRAG 1I | h  | H | 0.070  |
| H5  | 14.166208231 | -4.518657189 | -6.767189359  | FRAG 1I | h  | H | 0.060  |
| H6  | 15.185058073 | -2.374268591 | -6.105594083  | FRAG 1I | h  | H | 0.070  |
| C   | 9.389474514  | 8.427000142  | -8.267924327  | MOL 1B  | cp | C | -0.200 |
| HC  | 9.573912147  | 9.488034201  | -8.210939509  | MOL 1B  | h  | H | 0.060  |
| C1  | 9.288344385  | 7.795134648  | -9.509768892  | MOL 1B  | cp | C | 0.200  |
| C2  | 9.077166618  | 6.404337862  | -9.569526170  | MOL 1B  | cp | C | -0.130 |
| C3  | 8.974007344  | 5.686981706  | -8.369778996  | MOL 1B  | cp | C | 0.020  |

|      |              |              |               |     |    |    |   |        |
|------|--------------|--------------|---------------|-----|----|----|---|--------|
| H3   | 8.779981564  | 4.630089659  | -8.404994856  | MOL | 1B | h  | H | 0.060  |
| C4   | 9.080354564  | 6.312634898  | -7.122689298  | MOL | 1B | cp | C | -0.130 |
| C5   | 9.267284014  | 7.704117568  | -7.084245223  | MOL | 1B | cp | C | 0.200  |
| O    | 9.407414915  | 8.489660249  | -10.740173092 | MOL | 1B | o  | O | -0.300 |
| C6   | 8.919970904  | 5.697410528  | -10.971950794 | MOL | 1B | c1 | C | 0.090  |
| C7   | 8.930674378  | 5.512732680  | -5.771919915  | MOL | 1B | c1 | C | 0.090  |
| O1   | 9.411833920  | 8.350246697  | -5.839575373  | MOL | 1B | o  | O | -0.300 |
| C8   | 9.474078255  | 9.927665349  | -10.858893621 | MOL | 1B | c3 | C | 0.220  |
| C9   | 3.752780193  | 0.803597963  | -3.708585548  | MOL | 1B | c' | C | 0.500  |
| O2   | 3.809794768  | 1.635658034  | -4.810767268  | MOL | 1B | o  | O | -0.350 |
| CO   | 3.563031418  | 3.044995565  | -4.576048016  | MOL | 1B | c2 | C | 0.240  |
| HO1  | 4.277873176  | 3.424743530  | -3.820708951  | MOL | 1B | h  | H | 0.010  |
| HO2  | 2.548888421  | 3.209171093  | -4.162826663  | MOL | 1B | h  | H | 0.010  |
| O3   | 3.348782758  | 1.137034678  | -2.592704380  | MOL | 1B | o' | O | -0.400 |
| N    | 4.204929835  | -0.410944953 | -4.011576024  | MOL | 1B | n  | N | -0.340 |
| HN   | 4.536636499  | -0.465222953 | -4.978591333  | MOL | 1B | hn | H | 0.180  |
| C10  | 1.460356171  | 1.176644279  | -10.593420449 | MOL | 1B | c' | C | 0.500  |
| O4   | 2.585994355  | 1.971558189  | -10.672142052 | MOL | 1B | o  | O | -0.350 |
| C11  | 2.394318672  | 3.406425212  | -10.731929224 | MOL | 1B | c2 | C | 0.240  |
| H111 | 2.036017234  | 3.773216132  | -9.751834819  | MOL | 1B | h  | H | 0.010  |
| H112 | 1.623874914  | 3.684619612  | -11.477934730 | MOL | 1B | h  | H | 0.010  |
| O5   | 0.299404106  | 1.590186748  | -10.598628383 | MOL | 1B | o' | O | -0.400 |
| C12  | 8.495458239  | 9.416384833  | -5.500828826  | MOL | 1B | c3 | C | 0.220  |
| C13  | 6.365787675  | 6.913855310  | -13.625848455 | MOL | 1B | cp | C | -0.190 |
| H13  | 6.364728040  | 7.323738232  | -14.622290949 | MOL | 1B | h  | H | 0.060  |
| C14  | 7.586295349  | 6.656331700  | -12.992471649 | MOL | 1B | cp | C | 0.190  |
| C15  | 7.589959007  | 6.112514489  | -11.698252790 | MOL | 1B | cp | C | -0.120 |
| C16  | 6.371290425  | 5.850802569  | -11.065454986 | MOL | 1B | cp | C | 0.020  |
| H16  | 6.374322873  | 5.410282285  | -10.077851434 | MOL | 1B | h  | H | 0.060  |
| C17  | 5.149708527  | 6.073935568  | -11.709032460 | MOL | 1B | cp | C | -0.120 |
| C18  | 5.147906443  | 6.618147842  | -13.003484266 | MOL | 1B | cp | C | 0.190  |
| O6   | 8.844128532  | 6.884613651  | -13.604894584 | MOL | 1B | o  | O | -0.300 |
| C19  | 9.204742300  | 1.323444483  | -13.440516729 | MOL | 1B | c' | C | 0.500  |
| O7   | 9.588415831  | 1.767077148  | -14.524775617 | MOL | 1B | o' | O | -0.400 |
| O8   | 9.112053526  | 2.057934129  | -12.273252005 | MOL | 1B | o  | O | -0.350 |
| C20  | 9.292295464  | 3.491768892  | -12.390165210 | MOL | 1B | c2 | C | 0.240  |
| H201 | 10.295649773 | 3.736638663  | -12.789582202 | MOL | 1B | h  | H | 0.010  |
| H202 | 8.556691730  | 3.899442644  | -13.110181774 | MOL | 1B | h  | H | 0.010  |
| C21  | 3.828760625  | 5.616512612  | -10.995901301 | MOL | 1B | c1 | C | 0.090  |
| O9   | 3.889768097  | 6.819709133  | -13.625102553 | MOL | 1B | o  | O | -0.300 |
| C22  | 9.014183408  | 7.448221520  | -14.924551538 | MOL | 1B | c3 | C | 0.220  |
| C23  | 3.715419258  | 7.401902762  | -14.936233282 | MOL | 1B | c3 | C | 0.220  |
| C24  | 3.238933513  | 8.297203395  | -8.269039505  | MOL | 1B | cp | C | -0.200 |
| H24  | 3.020089858  | 9.351127583  | -8.220561744  | MOL | 1B | h  | H | 0.060  |
| C25  | 3.368016016  | 7.681138413  | -9.515738502  | MOL | 1B | cp | C | 0.200  |
| C26  | 3.639238702  | 6.303019527  | -9.587202876  | MOL | 1B | cp | C | -0.130 |
| C27  | 3.784281073  | 5.582334786  | -8.396722487  | MOL | 1B | cp | C | 0.020  |
| H27  | 4.032337834  | 4.537344789  | -8.448791450  | MOL | 1B | h  | H | 0.060  |
| C28  | 3.652608076  | 6.190942016  | -7.142155423  | MOL | 1B | cp | C | -0.130 |
| C29  | 3.381123191  | 7.570175121  | -7.085035578  | MOL | 1B | cp | C | 0.200  |
| O10  | 3.223257424  | 8.379955874  | -10.740917803 | MOL | 1B | o  | O | -0.300 |
| C30  | 3.841083558  | 5.375650697  | -5.803445301  | MOL | 1B | c1 | C | 0.090  |
| O11  | 3.248390946  | 8.155427641  | -5.800196337  | MOL | 1B | o  | O | -0.300 |

|      |              |              |               |     |    |    |   |        |
|------|--------------|--------------|---------------|-----|----|----|---|--------|
| C31  | 3.113081649  | 9.815746788  | -10.851615410 | MOL | 1B | c3 | C | 0.220  |
| C32  | 3.131653207  | 9.574874924  | -5.559457558  | MOL | 1B | c3 | C | 0.220  |
| C33  | 6.341903408  | 6.475000956  | -3.049554540  | MOL | 1B | cp | C | -0.190 |
| H33  | 6.326399356  | 6.801909563  | -2.022940982  | MOL | 1B | h  | H | 0.060  |
| C34  | 7.570781083  | 6.282008703  | -3.689991951  | MOL | 1B | cp | C | 0.190  |
| C35  | 7.591576641  | 5.846817859  | -5.024865707  | MOL | 1B | cp | C | -0.120 |
| C36  | 6.380307660  | 5.625254909  | -5.688053176  | MOL | 1B | cp | C | 0.020  |
| H36  | 6.395278769  | 5.268401910  | -6.708764060  | MOL | 1B | h  | H | 0.060  |
| C37  | 5.152121262  | 5.783807340  | -5.040180183  | MOL | 1B | cp | C | -0.120 |
| C38  | 5.133142324  | 6.219654968  | -3.705859130  | MOL | 1B | cp | C | 0.190  |
| O12  | 8.819605066  | 6.490757427  | -3.052818716  | MOL | 1B | o  | O | -0.300 |
| O13  | 3.866940745  | 6.345178881  | -3.081345392  | MOL | 1B | o  | O | -0.300 |
| C39  | 8.970394683  | 6.982619204  | -1.702314210  | MOL | 1B | c3 | C | 0.220  |
| C40  | 3.673093365  | 6.804509313  | -1.725033420  | MOL | 1B | c3 | C | 0.220  |
| C41  | 11.497251058 | 1.231416184  | -6.529502319  | MOL | 1B | c' | C | 0.500  |
| O14  | 10.337981783 | 1.967277940  | -6.390157562  | MOL | 1B | o  | O | -0.350 |
| C42  | 10.466038258 | 3.399367000  | -6.210737402  | MOL | 1B | c2 | C | 0.240  |
| H421 | 11.224362884 | 3.648690436  | -5.442450450  | MOL | 1B | h  | H | 0.010  |
| H422 | 10.806234140 | 3.861876495  | -7.156151264  | MOL | 1B | h  | H | 0.010  |
| O15  | 12.639133646 | 1.692375276  | -6.481070081  | MOL | 1B | o' | O | -0.400 |
| N1   | 11.213475984 | -0.052555385 | -6.729791160  | MOL | 1B | n  | N | -0.340 |
| H1   | 10.212754772 | -0.208126689 | -6.879966306  | MOL | 1B | hn | H | 0.180  |
| C43  | 9.101128857  | 3.959042938  | -5.779395108  | MOL | 1B | c2 | C | -0.010 |
| N2   | 8.809813718  | 0.068589770  | -13.239043133 | MOL | 1B | n  | N | -0.340 |
| H2   | 8.482590272  | -0.080116083 | -12.280535671 | MOL | 1B | hn | H | 0.180  |
| C44  | 9.104982366  | 4.144472924  | -11.008904460 | MOL | 1B | c2 | C | -0.010 |
| C45  | 3.721861104  | 3.818624483  | -5.897218097  | MOL | 1B | c2 | C | -0.010 |
| N3   | 1.800848402  | -0.105993355 | -10.504452453 | MOL | 1B | n  | N | -0.340 |
| HN3  | 2.808068241  | -0.230005729 | -10.369615987 | MOL | 1B | hn | H | 0.180  |
| C46  | 3.731735176  | 4.060837529  | -11.113068852 | MOL | 1B | c2 | C | -0.010 |
| H6   | 9.782175845  | 6.074100709  | -11.555493204 | MOL | 1B | h  | H | 0.040  |
| H7   | 9.776294951  | 5.864655869  | -5.149993900  | MOL | 1B | h  | H | 0.040  |
| H81  | 9.506482766  | 10.222201487 | -11.923296696 | MOL | 1B | h  | H | 0.020  |
| H82  | 8.588777760  | 10.410716812 | -10.405015669 | MOL | 1B | h  | H | -0.020 |
| H83  | 10.381630850 | 10.330487524 | -10.372363620 | MOL | 1B | h  | H | -0.010 |
| H121 | 8.651077716  | 10.307769428 | -6.136307195  | MOL | 1B | h  | H | -0.020 |
| H122 | 7.441396097  | 9.094468502  | -5.602810057  | MOL | 1B | h  | H | -0.030 |
| H123 | 8.644418797  | 9.726630739  | -4.450934118  | MOL | 1B | h  | H | 0.030  |
| H21  | 2.967052691  | 5.972838923  | -11.592636494 | MOL | 1B | h  | H | 0.040  |
| H221 | 8.543346714  | 6.812794510  | -15.697437355 | MOL | 1B | h  | H | -0.020 |
| H222 | 10.088039323 | 7.532637408  | -15.170220571 | MOL | 1B | h  | H | 0.020  |
| H223 | 8.575567803  | 8.461375279  | -14.988800730 | MOL | 1B | h  | H | -0.020 |
| H231 | 4.134325279  | 8.424410084  | -14.981832565 | MOL | 1B | h  | H | -0.010 |
| H232 | 2.641277440  | 7.470078671  | -15.185045504 | MOL | 1B | h  | H | -0.020 |
| H233 | 4.201248822  | 6.788589725  | -15.717854661 | MOL | 1B | h  | H | 0.020  |
| H30  | 2.963947128  | 5.664962717  | -5.192892151  | MOL | 1B | h  | H | 0.040  |
| H311 | 3.984310822  | 10.322693040 | -10.396593622 | MOL | 1B | h  | H | -0.020 |
| H312 | 3.069430698  | 10.115127688 | -11.914308864 | MOL | 1B | h  | H | 0.030  |
| H313 | 2.194951687  | 10.188058898 | -10.360723650 | MOL | 1B | h  | H | -0.030 |
| H321 | 3.103084924  | 9.776940036  | -4.473668413  | MOL | 1B | h  | H | -0.010 |
| H322 | 3.993156135  | 10.126704682 | -5.979518146  | MOL | 1B | h  | H | -0.020 |
| H323 | 2.203713391  | 9.983911934  | -6.000385996  | MOL | 1B | h  | H | 0.020  |
| H391 | 8.508541694  | 6.295464003  | -0.969259311  | MOL | 1B | h  | H | -0.010 |



|      |              |              |               |      |    |    |   |        |
|------|--------------|--------------|---------------|------|----|----|---|--------|
| H392 | 10.040850709 | 7.075203786  | -1.445002195  | MOL  | 1B | h  | H | 0.020  |
| H393 | 8.510548353  | 7.981496820  | -1.584542609  | MOL  | 1B | h  | H | -0.020 |
| H401 | 4.069155131  | 7.827699976  | -1.586361460  | MOL  | 1B | h  | H | -0.020 |
| H402 | 2.596568052  | 6.826362145  | -1.477539759  | MOL  | 1B | h  | H | 0.020  |
| H403 | 4.169645034  | 6.134973757  | -0.998434826  | MOL  | 1B | h  | H | -0.020 |
| H431 | 8.900334004  | 3.558941132  | -4.766588639  | MOL  | 1B | h  | H | 0.010  |
| H432 | 8.309743981  | 3.515030628  | -6.406295010  | MOL  | 1B | h  | H | 0.010  |
| H441 | 9.965929682  | 3.852082033  | -10.379021754 | MOL  | 1B | h  | H | 0.010  |
| H442 | 8.225106679  | 3.680649390  | -10.532932744 | MOL  | 1B | h  | H | 0.010  |
| H451 | 4.620664614  | 3.434239798  | -6.407235936  | MOL  | 1B | h  | H | 0.010  |
| H452 | 2.874179226  | 3.543721368  | -6.552456904  | MOL  | 1B | h  | H | 0.010  |
| H461 | 4.543501387  | 3.605298281  | -10.521676925 | MOL  | 1B | h  | H | 0.010  |
| H462 | 3.950098444  | 3.753187395  | -12.154138027 | MOL  | 1B | h  | H | 0.010  |
| C1   | 1.677579607  | -2.598370487 | -10.311021853 | FRAG | 1G | cp | C | -0.100 |
| C2   | 1.043303157  | -1.358326168 | -10.584059435 | FRAG | 1G | cp | C | 0.170  |
| C3   | -0.314079266 | -1.363495095 | -10.948469828 | FRAG | 1G | cp | C | -0.080 |
| C4   | -1.023921253 | -2.553526348 | -11.043435818 | FRAG | 1G | cp | C | -0.030 |
| C5   | -0.396598437 | -3.761027930 | -10.777681338 | FRAG | 1G | cp | C | -0.080 |
| C6   | 0.941891642  | -3.786695270 | -10.413396038 | FRAG | 1G | cp | C | -0.010 |
| H3   | -0.838021242 | -0.448857501 | -11.178604336 | FRAG | 1G | h  | H | 0.090  |
| H4   | -2.066148509 | -2.538906611 | -11.328922868 | FRAG | 1G | h  | H | 0.070  |
| H5   | -0.951676509 | -4.684865309 | -10.852623647 | FRAG | 1G | h  | H | 0.060  |
| H6   | 1.408924074  | -4.739487465 | -10.202842300 | FRAG | 1G | h  | H | 0.070  |
| C1   | 8.161755046  | -2.323460433 | -13.599770526 | FRAG | 1H | cp | C | -0.100 |
| C2   | 8.043247034  | -3.432296615 | -14.449358681 | FRAG | 1H | cp | C | -0.010 |
| C3   | 8.455681296  | -3.359060938 | -15.771585290 | FRAG | 1H | cp | C | -0.080 |
| C4   | 8.992160492  | -2.182382739 | -16.270014371 | FRAG | 1H | cp | C | -0.030 |
| C5   | 9.116063843  | -1.069708578 | -15.448411683 | FRAG | 1H | cp | C | -0.080 |
| C6   | 8.703266218  | -1.111766438 | -14.105110326 | FRAG | 1H | cp | C | 0.170  |
| H2   | 7.629151300  | -4.361648928 | -14.081578227 | FRAG | 1H | h  | H | 0.070  |
| H3   | 8.358683592  | -4.222209774 | -16.414041586 | FRAG | 1H | h  | H | 0.060  |
| H4   | 9.312725769  | -2.130543290 | -17.300787513 | FRAG | 1H | h  | H | 0.070  |
| H5   | 9.537973329  | -0.177777146 | -15.883191727 | FRAG | 1H | h  | H | 0.090  |
| C4C  | 8.920199390  | -2.702656881 | -6.624879755  | PORN | 1D | c[ | C | 0.020  |
| C3   | 9.111598997  | -2.575167604 | -5.189363052  | PORN | 1D | c# | C | -0.090 |
| C4   | 7.904539058  | -2.608698414 | -4.581594957  | PORN | 1D | c# | C | -0.090 |
| C4A  | 6.870089243  | -2.788650910 | -5.589587607  | PORN | 1D | c[ | C | 0.020  |
| N4B  | 7.545761697  | -2.886751361 | -6.810339958  | PORN | 1D | nb | N | -0.340 |
| CB   | 5.452051077  | -2.830000116 | -5.357437689  | PORN | 1D | c] | C | 0.000  |
| C6C  | 4.439126951  | -2.924560892 | -6.369449235  | PORN | 1D | c[ | C | 0.040  |
| C5   | 2.997447244  | -2.966439957 | -6.166909885  | PORN | 1D | c# | C | -0.070 |
| C6   | 2.383980450  | -2.927571648 | -7.375809225  | PORN | 1D | c# | C | -0.070 |
| C6A  | 3.399891909  | -2.887967674 | -8.418975598  | PORN | 1D | c[ | C | 0.040  |
| N6B  | 4.616784436  | -3.013476094 | -7.749600894  | PORN | 1D | na | N | -0.170 |
| H6B  | 5.532666876  | -2.997907069 | -8.213064898  | PORN | 1D | hn | H | 0.260  |
| CC   | 3.184356733  | -2.716589735 | -9.827645553  | PORN | 1D | c] | C | 0.000  |
| C8C  | 4.208698041  | -2.637324958 | -10.830483546 | PORN | 1D | c[ | C | 0.020  |
| C7   | 4.009131191  | -2.401387737 | -12.251050302 | PORN | 1D | c# | C | -0.090 |
| C8   | 5.215350422  | -2.332151679 | -12.857465785 | PORN | 1D | c# | C | -0.090 |
| H8   | 5.366094558  | -2.122842084 | -13.906035578 | PORN | 1D | h  | H | 0.080  |
| C8A  | 6.258597124  | -2.547816281 | -11.865689112 | PORN | 1D | c[ | C | 0.020  |
| N8B  | 5.590232411  | -2.775666154 | -10.658278746 | PORN | 1D | nb | N | -0.340 |
| H3   | 10.053450175 | -2.428267409 | -4.682041916  | PORN | 1D | h  | H | 0.080  |

|    |             |              |               |         |   |   |       |
|----|-------------|--------------|---------------|---------|---|---|-------|
| H4 | 7.746651706 | -2.492943884 | -3.519683359  | PORN 1D | h | H | 0.080 |
| H5 | 2.486921944 | -2.942240642 | -5.215226642  | PORN 1D | h | H | 0.090 |
| H6 | 1.315684411 | -2.865646789 | -7.524205780  | PORN 1D | h | H | 0.090 |
| H7 | 3.060713402 | -2.254740679 | -12.746120367 | PORN 1D | h | H | 0.080 |

end

end
